# Supplementary material for: Outpatient Nephrotoxic Medication Prescription after Pediatric Intensive Care Acute Kidney Injury
Source: MDPI journal article supplement (doi:10.3390/children8110948), 2021-10-21
Supplement: s1 [file s1]

**Table S5.** Dispensed medications in children with AKI

| <b>Medication Class</b> | <b>Frequency</b> | <b>Percent</b> | <b>Cumulative Frequency</b> | <b>Cumulative Percent</b> |
|-------------------------|------------------|----------------|-----------------------------|---------------------------|
| <b>BETA-LACTAMS</b>     | 1064             | 22.55          | 1064                        | 22.55                     |
| <b>PPI</b>              | 683              | 14.47          | 1747                        | 37.02                     |
| <b>ACE-INHIBITOR</b>    | 575              | 12.18          | 2322                        | 49.21                     |
| <b>OTHER ANTIBIOTIC</b> | 509              | 10.79          | 2831                        | 59.99                     |
| <b>SALICYLATE</b>       | 479              | 10.15          | 3310                        | 70.14                     |
| <b>IMMUNOMODULATOR</b>  | 469              | 9.94           | 3779                        | 80.08                     |
| <b>HIV MEDICATIO</b>    | 371              | 7.86           | 4150                        | 87.94                     |
| <b>OTHER</b>            | 292              | 6.19           | 4442                        | 94.13                     |
| <b>NSAID</b>            | 141              | 2.99           | 4583                        | 97.12                     |
| <b>ANTIVIRAL</b>        | 72               | 1.53           | 4655                        | 98.64                     |
| <b>AMINOGLYCOSIDE</b>   | 64               | 1.36           | 4719                        | 100.00                    |

Abbreviations: PPI: proton-pump inhibitors; ACE: angiotensin-converting enzyme; HIV: human immunodeficiency virus; NSAID: non-steroidal anti-inflammatory drug
