# Supplementary material for: Outpatient Nephrotoxic Medication Prescription after Pediatric Intensive Care Acute Kidney Injury
Source: MDPI journal article supplement (doi:10.3390/children8110948), 2021-10-21
Supplement: s1 [file s1]

**Table S3.** Patient characteristics by AKI status and by outcome status during the whole follow-up

| Characteristics                                                                   | AKI                   | No AKI                |
|-----------------------------------------------------------------------------------|-----------------------|-----------------------|
| N (denominator)                                                                   | 223                   | 747                   |
| <b>Baseline Factors</b>                                                           |                       |                       |
| Age, years (age)<br>Median [IQR]                                                  | 3.62<br>[0.61, 10.14] | 3.68<br>[1.04, 11.08] |
| Female Sex (%)                                                                    | 99 (44.4%)            | 324 (43.4%)           |
| Prior CKD                                                                         | 6 (2.7%)              | 17 (2.3%)             |
| 4 <sup>th</sup> /5 <sup>th</sup> quintile social deprivation index <sup>a</sup>   | 105 (50.2%)           | 371 (51.9%)           |
| 4 <sup>th</sup> /5 <sup>th</sup> quintile material deprivation index <sup>a</sup> | 116 (55.5%)           | 413 (57.8%)           |
| Rural home address <sup>b</sup>                                                   | 31 (14.4%)            | 117 (15.8%)           |
| <b>PICU Diagnosis</b>                                                             |                       |                       |
| Cardiac surgery                                                                   | 75 (33.6%)            | 66 (8.8%)*            |
| Cardiac (non-surgical)                                                            | 10 (4.5%)             | 32 (4.3%)             |
| Trauma                                                                            | 15 (6.7%)             | 67 (9.0%)             |
| Renal                                                                             | 4 (1.8%)              | 1 (0.1%)*             |
| Infection (non-bronchiolitis)                                                     | 34 (15.2%)            | 129 (17.3%)           |
| Neurologic/neurosurgical                                                          | 17 (7.6%)             | 100 (13.4%)*          |
| Gastrointestinal                                                                  | 13 (5.8%)             | 21 (2.8%)             |
| Oncologic                                                                         | 3 (1.3%)              | 17 (2.3%)             |
| Respiratory                                                                       | 14 (6.3%)             | 77 (10.3%)            |
| Diabetes                                                                          | 10 (4.5%)             | 16 (2.1%)             |
| Other admission diagnosis                                                         | 28 (12.6%)            | 221 (29.6%)*          |
| <b>PICU Variables</b>                                                             |                       |                       |
| Pediatric medical complexity                                                      |                       |                       |
| Non-chronic                                                                       | 18 (8.1%)             | 121 (16.2%)*          |
| Non-complex chronic                                                               | 33 (14.8%)            | 190 (25.4%)*          |
| Complex chronic                                                                   | 172 (77.1%)           | 436 (58.4%)*          |
| Postoperative (non-cardiac)                                                       | 45 (20.2%)            | 252 (33.7%)*          |
| Vasopressors used                                                                 | 95 (42.6%)            | 79 (10.6%)*           |
| Diuretics used                                                                    | 121 (54.3%)           | 137 (18.4%)*          |
| Steroids used                                                                     | 72 (32.3%)            | 197 (26.4%)           |
| Antibiotics used                                                                  | 183 (82.1%)           | 500 (66.9%)*          |
| PRISM score                                                                       | 11.00                 | 6.00                  |
| Median [IQR]                                                                      | [6.00, 16.50]         | [4.00, 10.00]*        |
| Mechanically ventilated                                                           | 155 (69.5%)           | 297 (39.8%)*          |
| PICU length of stay, days                                                         | 3.53                  | 1.07                  |
| Median [IQR]                                                                      | [1.68, 8.07]          | [0.76, 2.58]*         |
| Hospital length of stay, days                                                     | 14.00                 | 8.00                  |
| Median [IQR]                                                                      | [8.00, 29.00]         | [4.00, 14.00]*        |
| <b>Renal Factors in PICU</b>                                                      |                       |                       |
| Renal replacement therapy                                                         | 5 (2.2%)              | 0 (0.0%)*             |
| Nephrology consult                                                                | 35 (15.7%)            | 23 (3.1%)*            |
| Nephrotoxic antibiotics                                                           | 70 (31.4%)            | 123 (16.5%)*          |

|                       |            |             |
|-----------------------|------------|-------------|
| NSAIDs                | 42 (18.8%) | 82 (11.0%)* |
| Aminoglycosides       | 48 (21.5%) | 67 (9.0%)*  |
| Acyclovir/ganciclovir | 9 (4.0%)   | 18 (2.4%)   |
| Amphotericin          | 2 (0.1%)   | 2 (0.3%)    |
| Vancomycin            | 39 (17.5%) | 61 (8.2%)*  |

Abbreviations: AKI: acute kidney injury; IQR: interquartile range; CKD: chronic kidney disease; PICU: pediatric intensive care unit; PRISM: pediatric risk of mortality; NSAID: non-steroidal anti-inflammatory drug

<sup>a</sup> Total number of patients was lower for these variables (denominators by group: n=209 for AKI; n=715 for non-AKI; n=399 for <3 nephrotoxic medications during follow-up; n=525 for ≥3 nephrotoxic medications during follow-up).

<sup>b</sup> Total number of patients was lower for these variables (denominators by group: n=215 for AKI; n=741 for non-AKI; n=415 for <3 nephrotoxic medications during follow-up; n=541 for ≥3 nephrotoxic medications during follow-up)

\*p-value<0.05
