# Supplementary material for: Outpatient Nephrotoxic Medication Prescription after Pediatric Intensive Care Acute Kidney Injury
Source: MDPI journal article supplement (doi:10.3390/children8110948), 2021-10-21
Supplement: s1 [file s1]

**Table S2.** Comparisons between included and excluded children

| <b>Characteristics</b>                                               | <b>Included<br/>N (%)</b> | <b>Excluded; did<br/>not have ≥30<br/>days RAMQ<br/>coverage<br/>N (%)</b> |         |
|----------------------------------------------------------------------|---------------------------|----------------------------------------------------------------------------|---------|
| N (denominator)                                                      | 970                       | 1421                                                                       |         |
| <b>Baseline Factors</b>                                              |                           |                                                                            |         |
| Age, years<br>Median [IQR]                                           | 4 [1-11]                  | 4 [1-11]                                                                   | 0.37    |
| Female Sex (%)                                                       | 423 (44)                  | 632 (45)                                                                   | 0.71    |
| Prior CKD                                                            | 48 (5)                    | 76 (5)                                                                     | 0.71    |
| 4 <sup>th</sup> /5 <sup>th</sup> quintile social deprivation index   | 476 (52)                  | 442 (33)                                                                   | <0.0001 |
| 4 <sup>th</sup> /5 <sup>th</sup> quintile material deprivation index | 529 (57)                  | 458 (34)                                                                   | <0.0001 |
| Rural home address                                                   | 148 (15)                  | 227 (16)                                                                   | 0.57    |
| <b>PICU Diagnosis</b>                                                |                           |                                                                            |         |
| Cardiac surgery                                                      | 141 (15)                  | 209 (15)                                                                   | 0.95    |
| Cardiac (non-surgical)                                               | 42 (4)                    | 90 (6)                                                                     | 0.04    |
| Trauma                                                               | 82 (8)                    | 141 (10)                                                                   | 0.25    |
| Renal                                                                | 5 (0.5)                   | 14 (1)                                                                     | 0.25    |
| Infection (non-bronchiolitis)                                        | 163 (17)                  | 235 (17)                                                                   | 0.87    |
| Neurologic/neurosurgical                                             | 117 (12)                  | 181 (13)                                                                   | 0.66    |
| Gastrointestinal                                                     | 34 (4)                    | 43 (3)                                                                     | 0.56    |
| Oncologic                                                            | 20 (2)                    | 38 (3)                                                                     | 0.42    |
| Respiratory                                                          | 91 (9)                    | 135 (10)                                                                   | 0.94    |
| Diabetes                                                             | 26 (3)                    | 33 (2)                                                                     | 0.59    |
| Other admission diagnosis                                            | 249 (26)                  | 302 (21)                                                                   | 0.01    |
| <b>PICU Variables</b>                                                |                           |                                                                            |         |
| Pediatric medical complexity                                         |                           |                                                                            |         |
| Non-chronic                                                          | 139 (14)                  | 260 (18)                                                                   | 0.05    |
| Non-complex chronic                                                  | 223 (23)                  | 302 (21)                                                                   |         |
| Complex chronic                                                      | 608 (63)                  | 859 (60)                                                                   |         |
| Postoperative (non-cardiac)                                          | 141 (15)                  | 209 (15)                                                                   | 0.95    |
| Vasopressors used                                                    | 174 (18)                  | 241 (17)                                                                   | 0.55    |
| Diuretics used                                                       | 258 (27)                  | 384 (27)                                                                   | 0.85    |
| Steroids used                                                        | 269 (28)                  | 355 (25)                                                                   | 0.14    |
| Antibiotics used                                                     | 683 (70)                  | 979 (69)                                                                   | 0.44    |
| PRISM score<br>Median [IQR]                                          | 7 [4-11]                  | 7 [4-11]                                                                   | 0.78    |
| Mechanically ventilated                                              | 452 (47)                  | 638 (45)                                                                   | 0.43    |
| PICU length of stay, days<br>Median [IQR]                            | 1 [1-4]                   | 2 [1-4]                                                                    | 0.91    |
| Hospital length of stay, days<br>Median [IQR]                        | 9 [5-18]                  | 8 [5-16]                                                                   | 0.33    |

| Renal Factors in PICU        |          |          |      |
|------------------------------|----------|----------|------|
| Renal diagnosis on admission | 5 (1)    | 14 (1)   | 0.25 |
| Renal replacement therapy    | 5 (1)    | 7 (0)    | 1.00 |
| Nephrology consult           | 58 (6)   | 97 (7)   | 0.45 |
| Nephrotoxic antibiotics      | 193 (20) | 312 (22) | 0.24 |
| NSAIDs                       | 124(13)  | 157 (11) | 0.20 |
| Aminoglycosides              | 115 (12) | 184 (13) | 0.45 |
| Acyclovir/ganciclovir        | 27 (3)   | 47 (3)   | 0.55 |
| Amphotericin                 | 4 (0)    | 13 (1)   | 0.22 |
| Vancomycin                   | 100 (10) | 149 (10) | 0.95 |
