# Supplementary material for: Outpatient Nephrotoxic Medication Prescription after Pediatric Intensive Care Acute Kidney Injury
Source: MDPI journal article supplement (doi:10.3390/children8110948), 2021-10-21
Supplement: s1 [file s1]

**Table S6.** Dispensed medications for children with no AKI

| <b>Medication Class</b> | <b>Frequency</b> | <b>Percent</b> | <b>Cumulative Frequency</b> | <b>Cumulative Percent</b> |
|-------------------------|------------------|----------------|-----------------------------|---------------------------|
| <b>BETA-LACTAMS</b>     | 3218             | 41.85          | 3218                        | 41.85                     |
| <b>PPI</b>              | 1006             | 13.08          | 4224                        | 54.94                     |
| <b>OTHER ANTIBIOTIC</b> | 834              | 10.85          | 5058                        | 65.78                     |
| <b>OTHER</b>            | 829              | 10.78          | 5887                        | 76.56                     |
| <b>ACE-INHIBITOR</b>    | 480              | 6.24           | 6367                        | 82.81                     |
| <b>AMINOGLYCOSIDE</b>   | 470              | 6.11           | 6837                        | 88.92                     |
| <b>SALICYLATE</b>       | 403              | 5.24           | 7240                        | 94.16                     |
| <b>NSAID</b>            | 230              | 2.99           | 7470                        | 97.15                     |
| <b>HIV MEDICATION</b>   | 100              | 1.30           | 7570                        | 98.45                     |
| <b>IMMUNOMODULATOR</b>  | 70               | 0.91           | 7640                        | 99.36                     |
| <b>ANTIVIRAL AGE</b>    | 46               | 0.60           | 7686                        | 99.96                     |
| <b>ANTIFUNGAL</b>       | 3                | 0.04           | 7689                        | 100.00                    |

Abbreviations: PPI: proton-pump inhibitors; ACE: angiotensin-converting enzyme; NSAID: non-steroidal anti-inflammatory drug; HIV: human immunodeficiency virus
