# Supplementary material for: Outpatient Nephrotoxic Medication Prescription after Pediatric Intensive Care Acute Kidney Injury
Source: MDPI journal article supplement (doi:10.3390/children8110948), 2021-10-21
Supplement: s1 [file s1]

**Table S1.** List of Nephrotoxic Medications Included in the Study with RAMQ (provincial drug plan coverage) Code, Drug Name, Pharmacologic Category and Status as Established or Potential Nephrotoxic Medication

| RAMQ code | Drug name                                      | Pharmacologic Class                    | Established vs Potential |
|-----------|------------------------------------------------|----------------------------------------|--------------------------|
| 38561     | amikacine (sulfate d')                         | Antibiotic, Aminoglycoside             | E                        |
| 4212      | gentamicine (sulfate de)                       | Antibiotic, Aminoglycoside             | E                        |
| 44723     | gentamicine (sulfate de)/ sodium (chlorure de) | Antibiotic, Aminoglycoside             | E                        |
| 46704     | gentamycine                                    | Antibiotic, Aminoglycoside             | E                        |
| 5122      | kanamycine (sulfate de)                        | Antibiotic, Aminoglycoside             | E                        |
| 6409      | néomycine (sulfate de)                         | Antibiotic, Aminoglycoside             | E                        |
| 17828     | néomycine (sulfate de)                         | Antibiotic, Aminoglycoside             | E                        |
| 6422      | néomycine (sulfate de)/ gramicidine            | Antibiotic, Aminoglycoside             | E                        |
| 43046     | nétilmicine (sulfate de)                       | Antibiotic, Aminoglycoside             | E                        |
| 9139      | streptomycine (sulfate de)                     | Antibiotic, Aminoglycoside             | E                        |
| 42877     | tobramycine                                    | Antibiotic, Aminoglycoside             | E                        |
| 33816     | tobramycine (sulfate de)                       | Antibiotic, Aminoglycoside             | E                        |
| 46560     | tobramycine (sulfate de)                       | Antibiotic, Aminoglycoside             | E                        |
| 2145      | colistiméthate sodique                         | Antibiotic, Miscellaneous              | E                        |
| 42981     | pipéracilline sodique                          | Antibiotic, penicillin                 | E                        |
| 47097     | pipéracilline sodique/ tazobactam sodique      | Antibiotic, penicillin                 | E                        |
| 43085     | triméthoprimé/ sulfaméthoxazole                | Antibiotic, Sulfonamide Derivative     | E                        |
| 520       | amphotéricine b                                | Antifungal Agent                       | E                        |
| 46405     | amphotéricine B                                | Antifungal Agent                       | E                        |
| 5330      | lithium (carbonate de)                         | Antimanic Agent                        | E                        |
| 47237     | lithium (carbonate de)                         | Antimanic Agent                        | E                        |
| 47071     | lithium (citrate de)                           | Antimanic Agent                        | E                        |
| 40966     | cisplatine                                     | Antineoplastic Agent, Alkylating Agent | E                        |

|       |                                    |                                                         |   |
|-------|------------------------------------|---------------------------------------------------------|---|
| 45508 | ifosfamide                         | Antineoplastic Agent,<br>Alkylating Agent               | E |
| 47651 | méthotrexate                       | Antineoplastic Agent,<br>Antimetabolite<br>(Antifolate) | E |
| 47167 | indinavir (sulfate d')             | Antiretroviral, Protease<br>Inhibitor                   | E |
| 46314 | indinavir (sulfate d')             | Antiretroviral, Protease<br>Inhibitor                   | E |
| 44099 | acyclovir                          | Antiviral Agent                                         | E |
| 44034 | acyclovir sodique                  | Antiviral Agent                                         | E |
| 47187 | valacyclovir (chlorhydrate de)     | Antiviral agent                                         | E |
| 47435 | valganciclovir (chlorhydrate de)   | Antiviral agent                                         | E |
| 46824 | valganciclovir (chlorhydrate de)   | Antiviral agent                                         | E |
| 47134 | famciclovir                        | Antiviral Agent                                         | E |
| 46280 | famciclovir                        | Antiviral Agent                                         | E |
| 47143 | ganciclovir                        | Antiviral agent                                         | E |
| 46652 | ganciclovir                        | Antiviral agent                                         | E |
| 45550 | ganciclovir sodique                | Antiviral agent                                         | E |
| 45628 | pamidronate disodique              | Bisphosphonate Derivative                               | E |
| 44060 | cyclosporine                       | Calcineurin Inhibitor                                   | E |
| 46329 | cyclosporine                       | Calcineurin Inhibitor                                   | E |
| 46375 | cyclosporine                       | Calcineurin Inhibitor                                   | E |
| 47152 | tacrolimus                         | Calcineurin Inhibitor                                   | E |
| 46483 | tacrolimus                         | Calcineurin Inhibitor                                   | E |
| 10036 | vancomycine (chlorhydrate de)      | Glycopeptide                                            | E |
| 47327 | célécoxib                          | NSAID                                                   | E |
| 46546 | celecoxib                          | NSAID                                                   | E |
| 47078 | diclofénac (potassique ou sodique) | NSAID                                                   | E |
| 47768 | diclofénac diéthylamine            | NSAID                                                   | E |
| 41694 | diclofénac sodique                 | NSAID                                                   | E |
| 47059 | diclofénac sodique/misoprostol     | NSAID                                                   | E |
| 43150 | diflunisal                         | NSAID                                                   | E |
| 47122 | étodolac                           | NSAID                                                   | E |
| 46256 | étodolac                           | NSAID                                                   | E |
| 33803 | fenoprofène calcique               | NSAID                                                   | E |
| 44749 | flurbiprofène                      | NSAID                                                   | E |
| 4745  | ibuprofène                         | NSAID                                                   | E |

|       |                                                  |       |   |
|-------|--------------------------------------------------|-------|---|
| 46654 | ibuprofène                                       | NSAID | E |
| 47570 | ibuprofène/ méthocarbamol                        | NSAID | E |
| 47506 | ibuprofène/ pseudoéphédrine<br>(chlorhydrate de) | NSAID | E |
| 4810  | indométhacine                                    | NSAID | E |
| 38691 | kétoprofène                                      | NSAID | E |
| 47066 | kétorolac (trométhamine de)                      | NSAID | E |
| 46006 | kétorolac (trométhamine de)                      | NSAID | E |
| 46150 | ketorolac trométhamine                           | NSAID | E |
| 47631 | lumiracoxib                                      | NSAID | E |
| 44359 | méfénamique (acide)                              | NSAID | E |
| 47385 | méloxicam                                        | NSAID | E |
| 47084 | nabumétone                                       | NSAID | E |
| 46228 | nabumetone                                       | NSAID | E |
| 46626 | naproxen                                         | NSAID | E |
| 46152 | naproxen sodique                                 | NSAID | E |
| 46335 | naproxen sodique                                 | NSAID | E |
| 19752 | naproxène                                        | NSAID | E |
| 47890 | naproxène/ésoméprazole                           | NSAID | E |
| 7462  | phénylbutazone                                   | NSAID | E |
| 42019 | piroxicam                                        | NSAID | E |
| 46638 | piroxicam-B-cyclodextrine                        | NSAID | E |
| 40381 | sulindac                                         | NSAID | E |
| 45592 | tenoxicam                                        | NSAID | E |
| 45407 | tiaprofénique (acide)                            | NSAID | E |
| 37664 | tolmétine sodique                                | NSAID | E |
| 46858 | valdec Coxib                                     | NSAID | E |
| 47140 | lansoprazole                                     | PPI   | E |
| 46283 | lansoprozole                                     | PPI   | E |
| 47850 | dexlansoprazole                                  | PPI   | E |
| 47418 | esoméprazole (magnésium trihydraté)              | PPI   | E |
| 46761 | ésoméprazole magnésium                           | PPI   | E |
| 45519 | oméprazole                                       | PPI   | E |
| 47622 | oméprazole (base ou magnésien)                   | PPI   | E |
| 47146 | oméprazole magnésien                             | PPI   | E |
| 46713 | oméprazole magnésien                             | PPI   | E |
| 47616 | pantoprazole (magnésien ou sodique)              | PPI   | E |

|       |                                                                                                               |            |   |
|-------|---------------------------------------------------------------------------------------------------------------|------------|---|
| 47234 | pantoprazole sodique                                                                                          | PPI        | E |
| 46365 | pantoprazole sodique                                                                                          | PPI        | E |
| 47432 | rabéprazole sodique                                                                                           | PPI        | E |
| 47107 | salsalate                                                                                                     | Salicylate | E |
| 46208 | salsalate                                                                                                     | Salicylate | E |
| 45308 | 5-aminosalicylique (acide)                                                                                    | Salicylate | E |
| 143   | acétylsalicylique (acide)                                                                                     | Salicylate | E |
| 46353 | acétylsalicylique (acide)                                                                                     | Salicylate | E |
| 46372 | acétylsalicylique (acide)/ caféine/ codéine (phosphate)                                                       | Salicylate | E |
| 46232 | acétylsalicylique (acide)/ calcium (carbonate de)/ magnésium (carbonate de)/ magnésium (oxyde de)             | Salicylate | E |
| 38184 | acétylsalicylique (acide)/ codéine (phosphate de)                                                             | Salicylate | E |
| 38132 | acétylsalicylique (acide)/ dextropropoxyphène (napsylate de)                                                  | Salicylate | E |
| 46344 | acétylsalicylique (acide)/ oxycodone (chlorhydrate de)                                                        | Salicylate | E |
| 46036 | acétylsalicylique (acide)/ oxycodone(chlorhydrate d')                                                         | Salicylate | E |
| 46172 | acétylsalicylique (acide)/ phénobarbital/codéine (phosphate de)                                               | Salicylate | E |
| 46368 | acétylsalicylique acide/ caféine/codéine (phosphate)/ méprobamate                                             | Salicylate | E |
| 46077 | acétylsalicylique acide/ dipyrindamole                                                                        | Salicylate | E |
| 403   | aminosalicylate de sodium                                                                                     | Salicylate | E |
| 46583 | bismuth (subsalicylate de)                                                                                    | Salicylate | E |
| 46133 | choline (salicylate de)/ (choline salicylate)                                                                 | Salicylate | E |
| 47365 | dipyrindamole/ acétylsalicylique (acide)                                                                      | Salicylate | E |
| 45517 | ethylhexyl-P-methoxycinnate/ oxybenzone/ 2-ethylhexyl 2-cyano-3, 3-diphenyl acrylate/ 2-ethylhexyl salicylate | Salicylate | E |
| 46128 | methocarbamol/ acétylsalicylique (acide)                                                                      | Salicylate | E |
| 46098 | méthocarbamol/ acétylsalicylique (acide)/ codéine phosphate)                                                  | Salicylate | E |
| 47751 | nifédipine/acétylsalicylique (acide)                                                                          | Salicylate | E |
| 46094 | orphénadrine (citrate de)/ acétylsalicylique (acide)/ caféine                                                 | Salicylate | E |
| 13091 | physostigmine (salicylate de)                                                                                 | Salicylate | E |

|       |                                                              |                                        |   |
|-------|--------------------------------------------------------------|----------------------------------------|---|
| 47595 | pravastatine sodique/ acétylsalicylique (acide)              | Salicylate                             | E |
| 46198 | propoxyphène (napsylate)/ acétylsalicylique (acide)/ caféine | Salicylate                             | E |
| 8788  | salicylazosulfapyridine                                      | Salicylate                             | E |
| 8801  | salicylique (acide)                                          | Salicylate                             | E |
| 13468 | salicylique (acide)                                          | Salicylate                             | E |
| 47127 | iodixanol                                                    | Iodinated Contrast Media               | P |
| 45100 | iohexol                                                      | Iodinated Contrast Media               | P |
| 45074 | iopamidol                                                    | Iodinated Contrast Media               | P |
| 45600 | ioversol                                                     | Iodinated Contrast Media               | P |
| 47583 | gadobénate de diméglumine                                    | Gadolinium-Containing Contrast Agent   | P |
| 47495 | gadobutrol                                                   | Gadolinium-Containing Contrast Agent   | P |
| 47114 | gadodiamide                                                  | Gadolinium-Containing Contrast Agent   | P |
| 47734 | gadofosvéset trisodique                                      | Gadolinium-Containing Contrast Agent   | P |
| 47108 | gadopentétate de diméglumine                                 | Gadolinium-Containing Contrast Agent   | P |
| 47011 | gadotéridol                                                  | Gadolinium-Containing Contrast Agent   | P |
| 38834 | rifampine                                                    | Antibiotic, Miscellaneous              | P |
| 47244 | rifampine/ isoniazide/ pyrazinamide                          | Antibiotic, Miscellaneous              | P |
| 45403 | carboplatine                                                 | Antineoplastic Agent, Alkylating Agent | P |
| 47049 | bénazépril (chlorhydrate de)                                 | ACE inhibitor                          | P |
| 42071 | captopril                                                    | ACE inhibitor                          | P |
| 47056 | cilazapril                                                   | ACE inhibitor                          | P |
| 47320 | cilazapril/ hydrochlorothiazide                              | ACE inhibitor                          | P |
| 45476 | énalapril (maléate d')                                       | ACE inhibitor                          | P |
| 45572 | énalapril (maléate d')/ hydrochlorothiazide                  | ACE inhibitor                          | P |
| 47025 | énalapinate                                                  | ACE inhibitor                          | P |
| 47002 | fosinopril sodique                                           | ACE inhibitor                          | P |
| 45576 | lisinopril                                                   | ACE inhibitor                          | P |
| 47040 | lisinopril/ hydrochlorothiazide                              | ACE inhibitor                          | P |
| 47117 | perindopril erbumine                                         | ACE inhibitor                          | P |
| 46258 | perindopril erbumine                                         | ACE inhibitor                          | P |

|       |                                                    |                                                  |   |
|-------|----------------------------------------------------|--------------------------------------------------|---|
| 47449 | périndopril erbumine/indapamide                    | ACE inhibitor                                    | P |
| 45629 | quinapril (chlorhydrate de)                        | ACE inhibitor                                    | P |
| 47301 | quinapril (chlorhydrate de)<br>hydrochlorothiazide | ACE inhibitor                                    | P |
| 47079 | ramipril                                           | ACE inhibitor                                    | P |
| 46216 | ramipril                                           | ACE inhibitor                                    | P |
| 47655 | ramipril/ hydrochlorothiazide                      | ACE inhibitor                                    | P |
| 47250 | trandolapril                                       | ACE inhibitor                                    | P |
| 47440 | trandolapril/ vérapamil (chlorhydrate de)          | ACE inhibitor                                    | P |
| 41551 | céfadroxil (monohydrate de)                        | Antibiotic, Cephalosporin<br>(First Generation)  | P |
| 45422 | céfadroxil anhydre                                 | Antibiotic, Cephalosporin<br>(First Generation)  | P |
| 18725 | céfazoline sodique                                 | Antibiotic, Cephalosporin<br>(First Generation)  | P |
| 1612  | céphalexine (monohydrate de)                       | Antibiotic, Cephalosporin<br>(First Generation)  | P |
| 1638  | céphalotine sodique                                | Antibiotic, Cephalosporin<br>(First Generation)  | P |
| 19375 | céphapirine sodique                                | Antibiotic, Cephalosporin<br>(First Generation)  | P |
| 19739 | céphradine                                         | Antibiotic, Cephalosporin<br>(First Generation)  | P |
| 47149 | céfépime (chlorhydrate de)                         | Antibiotic, Cephalosporin<br>(Fourth Generation) | P |
| 42032 | céfaclor                                           | Antibiotic, Cephalosporin<br>(Second Generation) | P |
| 39601 | céfamandole (nafate de)                            | Antibiotic, Cephalosporin<br>(Second Generation) | P |
| 45559 | céfotétane disodique                               | Antibiotic, Cephalosporin<br>(Second Generation) | P |
| 44827 | céfoxitine sodique                                 | Antibiotic, Cephalosporin<br>(Second Generation) | P |
| 40433 | céfoxitine sodique                                 | Antibiotic, Cephalosporin<br>(Second Generation) | P |
| 47139 | cefprozil                                          | Antibiotic, Cephalosporin<br>(Second Generation) | P |
| 45573 | céfuroxime axetil                                  | Antibiotic, Cephalosporin<br>(Second Generation) | P |
| 41616 | céfuroxime sodique                                 | Antibiotic, Cephalosporin<br>(Second Generation) | P |
| 45546 | cefixime                                           | Antibiotic, Cephalosporin<br>(Third Generation)  | P |

|       |                                             |                                              |   |
|-------|---------------------------------------------|----------------------------------------------|---|
| 44450 | céfopérazone sodique                        | Antibiotic, Cephalosporin (Third Generation) | P |
| 42799 | céfotaxime sodique                          | Antibiotic, Cephalosporin (Third Generation) | P |
| 45615 | ceftazidime                                 | Antibiotic, Cephalosporin (Third Generation) | P |
| 45152 | ceftazidime (pentahydrate de)               | Antibiotic, Cephalosporin (Third Generation) | P |
| 45548 | ceftizoxime sodique                         | Antibiotic, Cephalosporin (Third Generation) | P |
| 45473 | ceftriaxone disodique                       | Antibiotic, Cephalosporin (Third Generation) | P |
| 47669 | ceftriaxone sodique                         | Antibiotic, Cephalosporin (Third Generation) | P |
| 45503 | ciprofloxacine (chlorhydrate de)            | Antibiotic, Fluoroquinolone                  | P |
| 45619 | ciprofloxacine                              | Antibiotic, Fluoroquinolone                  | P |
| 47258 | lévofloxacine                               | Antibiotic, Fluoroquinolone                  | P |
| 47391 | moxifloxacine (chlorhydrate de)             | Antibiotic, Fluoroquinolone                  | P |
| 46698 | moxifloxacine(chlorhydrate de)              | Antibiotic, Fluoroquinolone                  | P |
| 45443 | norfloxacine                                | Antibiotic, Fluoroquinolone                  | P |
| 45604 | ofloxacine                                  | Antibiotic, Fluoroquinolone                  | P |
| 6331  | nalidixique (acide)                         | Antibiotic, Fluoroquinolone                  | P |
| 2431  | dapsone                                     | Antibiotic, Miscellaneous                    | P |
| 18244 | amoxicilline                                | Antibiotic, penicillin                       | P |
| 44333 | amoxicilline/ clavulanate de potassium      | Antibiotic, penicillin                       | P |
| 46515 | amoxicilline/clavulanate de potassium       | Antibiotic, penicillin                       | P |
| 533   | ampicilline                                 | Antibiotic, penicillin                       | P |
| 546   | ampicilline sodique                         | Antibiotic, penicillin                       | P |
| 18257 | ampicilline/ probénécide                    | Antibiotic, penicillin                       | P |
| 45487 | bacampicilline (chlorhydrate de)            | Antibiotic, penicillin                       | P |
| 47292 | lansoprazole/ amoxicilline/ clarithromycine | Antibiotic, penicillin                       | P |
| 6318  | nafcilline sodique                          | Antibiotic, Penicillin                       | P |
| 6773  | oxacilline sodique                          | Antibiotic, Penicillin                       | P |

|       |                                                                                 |                                    |   |
|-------|---------------------------------------------------------------------------------|------------------------------------|---|
| 42110 | pénicilline g (ammoniacale ou potassique)                                       | Antibiotic, penicillin             | P |
| 7007  | pénicilline g (benzathine)                                                      | Antibiotic, penicillin             | P |
| 7020  | pénicilline g (benzathine)/ pénicilline g procaïnique/ pénicilline g potassique | Antibiotic, penicillin             | P |
| 7033  | pénicilline g ammoniacale                                                       | Antibiotic, penicillin             | P |
| 7046  | pénicilline g potassique                                                        | Antibiotic, penicillin             | P |
| 7059  | pénicilline g procaïnique                                                       | Antibiotic, penicillin             | P |
| 7072  | pénicilline G sodique                                                           | Antibiotic, penicillin             | P |
| 7371  | phénoxy méthylpénicilline                                                       | Antibiotic, penicillin             | P |
| 42123 | phénoxy méthylpénicilline (base ou sel potassique)                              | Antibiotic, penicillin             | P |
| 7384  | phénoxy méthylpénicilline (benzathine)                                          | Antibiotic, penicillin             | P |
| 7397  | phénoxy méthylpénicilline potassique                                            | Antibiotic, penicillin             | P |
| 45424 | pivampicilline                                                                  | Antibiotic, penicillin             | P |
| 45191 | pivmécilliname (chlorhydrate de)                                                | Antibiotic, penicillin             | P |
| 38743 | ticarcilline disodique                                                          | Antibiotic, penicillin             | P |
| 45560 | ticarcilline disodique/ clavulanate de potassium                                | Antibiotic, penicillin             | P |
| 47229 | topiramate                                                                      | Anticonvulsant, Miscellaneous      | P |
| 46359 | topiramate                                                                      | Anticonvulsant, Miscellaneous      | P |
| 45557 | pentamidine (iséthionate de)                                                    | Antifungal Agent, Antiprotozoal    | P |
| 45507 | pentamidine iséthionate                                                         | Antifungal Agent, Antiprotozoal    | P |
| 4524  | hydralazine (chlorhydrate d')                                                   | Antihypertensive; Vasodilator      | P |
| 8489  | quinine (sulfate de)                                                            | Antimalarial Agent                 | P |
| 47307 | clopidogrel (bisulfate de)                                                      | Antiplatelet Agent, Thienopyridine | P |
| 46486 | clopidogrel                                                                     | Antiplatelet Agent, Thienopyridine | P |
| 47397 | lopinavir/ ritonavir                                                            | Antiretroviral, Protease Inhibitor | P |
| 46714 | lopinavir/ritonavir                                                             | Antiretroviral, Protease Inhibitor | P |
| 47170 | ritonavir                                                                       | Antiretroviral, Protease Inhibitor | P |
| 46313 | ritonavir                                                                       | Antiretroviral, Protease Inhibitor | P |



|       |                                                              |                                     |   |
|-------|--------------------------------------------------------------|-------------------------------------|---|
| 47479 | atazanavir (sulfate d')                                      | Antiretroviral, Protease Inhibitor  | P |
| 8242  | propylthiouracile                                            | Antithyroid agent, thioamide        | P |
| 47877 | boceprevir, ribavirine, peginterféron alfa 2B                | Biological Response Modulator       | P |
| 47886 | bocéprévir/ribavirine/interféron alfa-2B péguylé             | Biological Response Modulator       | P |
| 45444 | interféron alfa-2b                                           | Biological Response Modulator       | P |
| 47314 | interféron alfa-2b (sans albumine humaine)                   | Biological Response Modulator       | P |
| 47406 | interféron alfa-2B péguylé                                   | Biological Response Modulator       | P |
| 47321 | ribavirine/ interferon alfa-2B                               | Biological Response Modulator       | P |
| 47445 | ribavirine/ interféron alfa-2B péguylé                       | Biological Response Modulator       | P |
| 46849 | ribavirine/interféron alfa- 2B pégylé                        | Biological Response Modulator       | P |
| 46535 | ribavirine/interferon alfa-2B                                | Biological Response Modulator       | P |
| 47386 | zolédronique (acide)                                         | Bisphosphonate Derivative           | P |
| 46695 | zolidronique acide                                           | Bisphosphonate Derivative           | P |
| 45256 | auranofine                                                   | Gold Compound                       | P |
| 715   | aurothiomalate de sodium                                     | Gold Compound                       | P |
| 43163 | ranitidine (chlorhydrate de)                                 | Histamine H2 Antagonist             | P |
| 47257 | ranitidine citrate de bismuth                                | Histamine H2 Antagonist             | P |
| 47573 | bevacizumab                                                  | Monoclonal Antibody, VEGF inhibitor | P |
| 47800 | temsirolimus                                                 | mTOR Kinase Inhibitor               | P |
| 47411 | sirolimus                                                    | mTOR Kinase Inhibitor               | P |
| 46736 | sirolimus                                                    | mTOR Kinase Inhibitor               | P |
| 47607 | adéfovir dipivoxil                                           | Reverse Transcriptase Inhibitor     | P |
| 47724 | éfavirenz/ emtricitabine/ ténofovir disoproxil (fumarate de) | Reverse Transcriptase Inhibitor     | P |
| 47605 | emtricitabine/ ténofovir disoproxil (fumarate de)            | Reverse Transcriptase Inhibitor     | P |
| 47502 | tenofovir disoproxil                                         | Reverse Transcriptase Inhibitor     | P |
| 47512 | ténofovir disoproxil (fumarate de)                           | Reverse Transcriptase Inhibitor     | P |

|       |                                                 |                                             |   |
|-------|-------------------------------------------------|---------------------------------------------|---|
| 47324 | abacavir (sulfate d')                           | Reverse Transcriptase Inhibitor, Nucleoside | P |
| 47422 | abacavir (sulfate d') / lamivudine / zidovudine | Reverse Transcriptase Inhibitor, Nucleoside | P |
| 46564 | abacavir (sulfate d')                           | Reverse Transcriptase Inhibitor, Nucleoside | P |
| 47576 | abacavir (sulfate d')/lamivudine                | Reverse Transcriptase Inhibitor, Nucleoside | P |
| 46769 | abacavir sulfate/lamivudine/ zidovudine         | Reverse Transcriptase Inhibitor, Nucleoside | P |
| 45611 | didanosine                                      | Reverse Transcriptase Inhibitor, Nucleoside | P |
| 46581 | didanosine                                      | Reverse Transcriptase Inhibitor, Nucleoside | P |
| 47147 | lamivudine                                      | Reverse Transcriptase Inhibitor, Nucleoside | P |
| 46514 | lamivudine                                      | Reverse Transcriptase Inhibitor, Nucleoside | P |
| 47310 | lamivudine/ zidovudine                          | Reverse Transcriptase Inhibitor, Nucleoside | P |
| 46520 | lamivudine/zidovudine                           | Reverse Transcriptase Inhibitor, Nucleoside | P |
| 195   | allopurinol                                     | Xanthine Oxidase Inhibitor                  | P |
