# Supplementary material for: Outpatient Nephrotoxic Medication Prescription after Pediatric Intensive Care Acute Kidney Injury
Source: MDPI journal article supplement (doi:10.3390/children8110948), 2021-10-21
Supplement: s1 [file s1]

**Table S4.** Adjusted Association Between AKI and Receiving  $\geq 3$  Potential Nephrotoxic Medication Prescriptions and Classes

|                                                                            | <b>AKI vs.<br/>no AKI</b>                                      |                                                               | <b>Stage 2/3 vs.<br/>no AKI or Stage 1 AKI</b>             |                                                               |
|----------------------------------------------------------------------------|----------------------------------------------------------------|---------------------------------------------------------------|------------------------------------------------------------|---------------------------------------------------------------|
|                                                                            | <b>First year<br/>(n=953)<br/>Adjusted<br/>RR<br/>(95% CI)</b> | <b>First 5 years<br/>(n=910)<br/>Adjusted RR<br/>(95% CI)</b> | <b>First year<br/>(n=953)<br/>Adjusted RR<br/>(95% CI)</b> | <b>First 5 years<br/>(n=910)<br/>Adjusted RR<br/>(95% CI)</b> |
| <b><math>\geq 3</math> potential nephrotoxic medication prescriptions</b>  | 1.01<br>(0.94-1.09) <sup>a</sup>                               | 1.06<br>(0.88-1.28) <sup>b</sup>                              | 1.03<br>(0.93-1.15) <sup>a</sup>                           | 1.17<br>(0.87-1.59) <sup>b</sup>                              |
| <b><math>\geq 3</math> potential nephrotoxic medication <i>classes</i></b> | 1.03<br>(0.97-1.09) <sup>c</sup>                               | 1.07<br>(1.00-1.16) <sup>d</sup>                              | 1.03<br>(0.94-1.12) <sup>c</sup>                           | 1.10<br>(0.97-1.25) <sup>d</sup>                              |

Abbreviations: AKI: Acute Kidney Injury; RR: Risk Ratio; ACE-inhibitors: Angiotensin Converting Enzyme inhibitors

NB: All models include covariates: age, gender, rural versus urban home address, pediatric medical complexity algorithm and social and material deprivation indices. Additional model covariates (associated with the exposure and outcome of the analysis) include:

- a. cardiac surgery, trauma, diabetes, diuretics, antibiotics, PRISM score
- b. cardiac surgery, trauma, diabetes, diuretics, antibiotics
- c. cardiac surgery, trauma, diuretics, antibiotics
